# Supplementary material
Source: ML conference proceedings conference paper supplement (https://openreview.net/forum?id=JDnLXc4NOn)
Supplement: supplementary_material [file attachment]

## 590 A Multi-armed bandits

591 The Multi-Armed Bandit (**MAB**) setting is a problem from machine learning where a learner interacts  
 592 with an environment over  $N$  rounds by following a policy  $\pi$ . At each round  $t$  the learner chooses  
 593 one of the environment's  $K$  arms,  $a \in \mathcal{A}$  where  $K = |\mathcal{A}|$ , after which the environment provides a  
 594 reward  $R_t$ . Rewards for unplayed arms are not observed. The goal of the learner is to adopt a policy  
 595  $\pi$  that selects actions that lead to the largest cumulative reward over  $N$  rounds,  $R = \sum_{t=1}^N R_t$ . In  
 596 this work we assume a finite  $K$  and that the underlying reward distribution of each arm may have a  
 597 variety of properties (e.g. stochasticity or stationarity) depending on the exact scenario, leading to  
 598 different optimal policies [34].

599 **Adversarial MAB.** The adversarial MAB setting assumes that the reward-generating process is  
 600 controlled by an adversary. This assumption allows for modelling non-stationary and highly stochastic  
 601 reward signals. We will later show why our FLAD formulation fits into this setting. Under this setting,  
 602 it is assumed that an adversary is given access to the learner's policy  $\pi$  and determines the sequence  
 603 of rewards,  $(R_{a,t})_{t=1}^N$ , for each arm prior to play [38]. At each turn  $\pi$  determines a distribution  
 604 over actions,  $p(\mathcal{A})$ , and an action is sampled from the distribution,  $a \sim p(\mathcal{A})$ . See Lattimore &  
 605 Szepesvári [34] for further details.

606 **The EXP3 algorithm.** The EXP3 algorithm (“*Exponential-weight algorithm for Exploration and*  
 607 *Exploitation*”) targets the adversarial multi-armed bandit problem by choosing arms according to a  
 608 Gibbs distribution based on the empirically determined importance-weighted rewards of arms [21].  
 609 To allow for exploration, EXP3 mixes the Gibbs distribution with a uniform distribution.

610 Formally, let the exploration rate be  $\gamma \in (0, 1]$ . At round  $t$ ,  $\pi$  defines the probability of selecting a  
 611 given arm,  $a \in \mathcal{A}$ , as a linear combination of Gibbs and uniform distributions

$$p_t(a) = (1 - \gamma) \frac{\exp(\gamma \hat{R}_{a,t-1}/K)}{\sum_{a'} \exp(\gamma \hat{R}_{a',t-1}/K)} + \frac{\gamma}{K} \quad (1)$$

612 where the importance weighted reward  $\hat{R}_{a,t}$  is calculated as

$$\hat{R}_{a,t} = \hat{R}_{a,t-1} + \frac{R_{a,t}}{p_{t-1}(a)} \quad (2)$$

613 and  $R_{a,t}$  denotes the observed reward. All unplayed arms,  $a' \neq a$  have unchanged importance  
 614 weighted rewards;  $\hat{R}_{a',t} = \hat{R}_{a',t-1}$ .

615 Algorithmically, EXP3 takes the following steps at each round: First, calculate the sampling distribu-  
 616 tion  $p_t$  and sample an arm from the distribution. Then a reward  $R_{a,t}$  is observed and the algorithm  
 617 updates the importance weighted reward  $\hat{R}_{a,t}$  for the played arm.

618 Informally, the use of an importance-weighted estimated reward compensates the rewards of actions  
 619 that are less likely to be chosen, guaranteeing that the expected estimated reward is equal to the  
 620 actual reward for each action. EXP3 is designed to be nearly optimal in the worst case, but due to the  
 621 exploration rate it will select “bad” actions at a rate of  $\gamma/K$ . The exploration of EXP3 combined  
 622 with importance-weighting allows the policy to handle non-stationary reward-generating processes.

623 **The UCB1 algorithm.** While the adversarial setting makes almost no assumptions about the  
 624 reward-generating process and therefore maintains its performance guarantees under almost any  
 625 circumstances, it can be outperformed in settings that *are* constrained. In this section we assume  
 626 that the reward-generating processes are stationary Gaussian distributions. A common policy used to  
 627 solve this MAB setting is the Upper Confidence Bound (UCB1) algorithm, which assigns each arm a  
 628 value called the upper confidence bound based on Hoeffding's inequality [22]. The UCB1 algorithm  
 629 is based on the principle of *optimism in the face of uncertainty*, meaning that with high probability  
 630 the upper confidence bound assigned to each arm is an overestimate of the unknown mean reward.

631 Formally, let the estimated mean reward of arm  $a$  after being played  $n_a$  times be  $\hat{R}_a$  and the true  
 632 mean reward be  $R_a$ , then

$$\mathbb{P}\left(R_a \geq \hat{R}_a + \sqrt{\frac{2 \ln(1/\delta)}{n_a}}\right) \leq \delta \quad \forall \delta \in (0, 1)$$

633 derived from Hoeffding’s inequality (following equation 7.1 of Lattimore & Szepesvári [34]), where  
 634  $\delta$  is the confidence level that quantifies the degree of certainty in the arm. In this work we let  $\delta = 1/t$   
 635 where  $t$  is the number of rounds played, shrinking the confidence bound over rounds. Thus, we define  
 636 the upper confidence bound for arm  $a$  at turn  $t$  as

$$UCB_{a,t} = \begin{cases} \infty, & \text{if } n_a = 0 \\ \hat{R}_a + \sqrt{\frac{2 \ln t}{n_a}}, & \text{otherwise} \end{cases} \quad (3)$$

637 Algorithmically, UCB1 takes the following steps at each round. First, the UCB1 policy plays the arm  
 638 with largest upper confidence bound,  $a^* = \arg \max_{a \in \mathcal{A}} UCB_{a,t}$ . Next, a reward  $R_{a^*,t}$  is observed  
 639 and the algorithm updates  $\hat{R}_{a^*}$  (the estimated mean reward for  $a^*$ ) and the upper confidence bounds  
 640 for all  $a$ . Informally, this algorithm suggests that the learner should play arms more often if they  
 641 either 1. have large expected reward,  $\hat{R}$ , or 2.  $n_a$  is small because the arm is not well explored.

## 642 B Pseudo-code

643 We include here pseudo-code for our 2 proposed algorithms. Algorithm 1 contains the pseudo-code  
 644 for EXP3-FLAD, and Algorithm 2 contains the pseudo-code for UCB1-FLAD.

---

### Algorithm 1 EXP3-FLAD

---

**Require:**  $\mathcal{D}_{\mathcal{A}}, \mathcal{D}_{\mathcal{T}}$ : Auxiliary and target datasets  
**Require:**  $f_{\theta}$ : Parameterized model  
**Require:**  $G$ : Gradient accumulation steps  
 1: **Initialize:**  $K = |\mathcal{A}|$ ;  $\mathcal{E}_0 = \frac{1}{K}$ ;  
      $\forall a \in \mathcal{A} : \nabla_a = 0, \hat{R}_a = 1$   
 2: **for**  $t = 1, 2, \dots, N$  **do**  
 3:    $\mathcal{E}_t = \min \left\{ \frac{1}{K}, \sqrt{\frac{\ln K}{K \cdot t}} \right\}$   
 4:    $\forall a \in \mathcal{A} : \pi(a) \leftarrow (1 - K\mathcal{E}_t) \frac{\exp(\mathcal{E}_{t-1} \hat{R}_a)}{\sum_{a'} \exp(\mathcal{E}_{t-1} \hat{R}_{a'})} + \mathcal{E}_t$   
 5:   Sample  $a \sim \pi(\mathcal{A})$  and batch  $\{\mathbf{x}, \mathbf{y}\} \sim \mathcal{D}_a$   
 6:    $\nabla_a \leftarrow \nabla_a + \nabla_{\theta} \mathcal{L}(f_{\theta}, \mathbf{x}, \mathbf{y})$   
 7:   **if**  $t \pmod{G} \equiv 0$  **then**  
 8:      $\nabla_{\mathcal{T}} \leftarrow \nabla_{\theta} \mathcal{L}(f_{\theta}, \mathcal{D}_{\mathcal{T}})$   
 9:     Update model parameters w.r.t.  $\nabla_{\mathcal{T}} + \sum_a \nabla_a$   
 10:    **for all**  $\{a \in \mathcal{A} | \nabla_a \neq 0\}$  **do**  
 11:      $\hat{R}_a \leftarrow \hat{R}_a + \frac{R_{a,t}}{\pi(a)}$   
 12:      $\nabla_a \leftarrow 0$   
 13:    **end for**  
 14:   **end if**  
 15: **end for**

---

---

**Algorithm 2** UCB1-FLAD

---

**Require:**  $\mathcal{D}_A, \mathcal{D}_T$ : Auxiliary and target datasets

**Require:**  $f_\theta$ : Parameterized model

**Require:**  $G$ : Gradient accumulation steps

**Require:**  $\beta$ : Smoothing factor

```
1: Initialize:  
    $\forall a \in \mathcal{A} : n_a = 1,$   
    $\hat{R}_a = \cos(\nabla_\theta \mathcal{L}(f_\theta, \mathcal{D}_T), \nabla_\theta \mathcal{L}(f_\theta, \mathcal{D}_a))$   
2: for  $t = 1, 2, \dots, N$  do  
3:    $a^* = \operatorname{argmax}_{a \in \mathcal{A}} \hat{R}_a + \sqrt{\frac{2 \ln t}{n_a}}$   
4:   Sample batch  $\{\mathbf{x}, \mathbf{y}\} \sim \mathcal{D}_{a^*}$   
5:    $\nabla_{a^*} \leftarrow \nabla_{a^*} + \nabla_\theta \mathcal{L}(f_\theta, \mathbf{x}, \mathbf{y})$   
6:    $n_{a^*} \leftarrow n_{a^*} + 1$   
7:   if  $t \pmod G \equiv 0$  then  
8:      $\nabla_T \leftarrow \nabla_\theta \mathcal{L}(f_\theta, \mathcal{D}_T)$   
9:     Update model parameters w.r.t.  $\nabla_T + \sum_a \nabla_a$   
10:    for all  $\{a \in \mathcal{A} | \nabla_a \neq 0\}$  do  
11:       $\hat{R}_a \leftarrow (1 - \beta)\hat{R}_a + \beta R_{a,t}$   
12:       $\nabla_a \leftarrow 0$   
13:    end for  
14:  end if  
15: end for
```

---

## C Training details

We train all models (FLAD and non-FLAD) on 40Gb A100s.

For all experiments, we use validation-based early stopping, and train for a maximum of 10,000 gradient update steps. In practice, we find that early-stopping leads to significantly fewer than 10,000 updates, usually between 50-150 for direct fine-tuning, and 1-2,000 for other methods.

For the smoothing factor,  $\beta$ , in UCB1-FLAD we ran preliminary experiments using values of  $\{0.99, 0.9, 0.75, 0.5\}$  and found 0.9 to work well across datasets. All reported scores use  $\beta = 0.9$ .

In preliminary experiments we consider rewards using gradients from multiple model partitions: the full model, encoder-only, decoder-only, and language modelling head (token classifier). We find that using the parameters from the LM head provides best performance, followed by the decoder-only, encoder-only, and full model gradients. The differential from best to worst method was  $\sim 3\%$  relative performance. Recall that with a gradient accumulation factor of  $G$ , our algorithms need to store at most  $G + 1$  gradients at any time. So not only does using the LM head provide performance improvements, but also saves memory. For the models we use, the LM head contains only 2.3% of the full model parameters.

## D Full results

The full results of experiments on target-only fine-tuning, explore-only, exploit-only, EXP3-FLAD, and UCB1-FLAD are found on the next page.

Table 2: Detailed results from the main experiment including direct fine-tuning, exploration-only, exploitation-only baselines and our proposed methods, EXP3-FLAD and UCB1-FLAD.

|       | Dataset                  | Anti-t1 | Anti-t2 | Anti-t3 | CB   | COPA | Hellaswag | RTE  | Story Cloze | WIC  | Wingrande | WSC  | Average |
|-------|--------------------------|---------|---------|---------|------|------|-----------|------|-------------|------|-----------|------|---------|
| T5-3B | Direct Fine-Tuning       | 37.6    | 36.2    | 35.0    | 83.2 | 53.8 | 51.0      | 54.2 | 75.9        | 51.6 | 49.6      | 53.1 | 52.8    |
|       | Loss-Scaling ( $G/A$ )   | 35.7    | 36.4    | 35.3    | 82.5 | 58.0 | 51.8      | 59.0 | 79.6        | 49.8 | 50.4      | 46.9 | 53.2    |
|       | Loss-Scaling ( $G/M/S$ ) | 37.8    | 37.6    | 36.0    | 80.0 | 76.4 | 52.6      | 55.3 | 85.7        | 50.6 | 52.0      | 51.7 | 56.0    |
|       | Exploitation-Only        | 38.1    | 40.3    | 36.7    | 88.6 | 85.6 | 51.2      | 67.6 | 88.8        | 51.0 | 55.5      | 47.7 | 59.2    |
|       | Exploitation-Only        | 38.8    | 40.5    | 38.0    | 86.1 | 86.0 | 51.1      | 69.4 | 89.5        | 52.8 | 59.2      | 46.3 | 59.8    |
|       | EXP3-FLAD ( $R_{G/A}$ )  | 40.6    | 39.9    | 36.9    | 86.1 | 89.8 | 52.0      | 76.7 | 90.8        | 50.5 | 60.3      | 52.9 | 61.5    |
|       | UCB1-FLAD ( $R_{G/A}$ )  | 41.8    | 39.0    | 38.0    | 85.4 | 87.0 | 52.0      | 79.1 | 91.4        | 49.7 | 62.7      | 56.2 | 62.0    |
|       | EXP3-FLAD ( $R_{GMS}$ )  | 42.0    | 40.2    | 36.6    | 87.1 | 87.2 | 52.4      | 77.5 | 90.9        | 51.1 | 61.9      | 51.9 | 61.7    |
|       | UCB1-FLAD ( $R_{GMS}$ )  | 41.3    | 39.7    | 38.0    | 82.5 | 89.8 | 51.0      | 76.6 | 90.5        | 51.0 | 62.0      | 56.0 | 61.7    |
|       | EXP3-FLAD ( $R_{AGG}$ )  | 38.6    | 39.8    | 39.1    | 86.8 | 91.2 | 51.2      | 78.8 | 90.4        | 50.7 | 63.0      | 52.9 | 62.0    |
|       | UCB1-FLAD ( $R_{AGG}$ )  | 42.0    | 41.0    | 36.6    | 88.2 | 86.8 | 51.0      | 77.3 | 90.3        | 51.1 | 63.3      | 55.4 | 62.1    |
|       | TOMix                    |         |         |         |      |      |           |      |             |      |           |      |         |
| P3    | Loss-Scaling ( $G/A$ )   | 38.7    | 39.5    | 34.8    | 80.7 | 64.4 | 52.7      | 62.9 | 80.1        | 50.3 | 51.9      | 51.2 | 55.2    |
|       | Loss-Scaling ( $G/M/S$ ) | 39.2    | 38.7    | 36.4    | 85.0 | 67.8 | 51.9      | 62.4 | 84.8        | 50.3 | 51.8      | 52.1 | 56.4    |
|       | Exploitation-Only        | 40.1    | 37.7    | 36.0    | 85.4 | 83.6 | 52.1      | 77.3 | 89.1        | 51.5 | 57.2      | 57.1 | 60.6    |
|       | Exploitation-Only        | 40.4    | 37.2    | 37.3    | 87.1 | 84.4 | 51.0      | 78.6 | 90.3        | 51.3 | 56.2      | 51.5 | 60.5    |
|       | EXP3-FLAD ( $R_{G/A}$ )  | 46.9    | 38.8    | 40.2    | 89.6 | 88.0 | 51.5      | 76.9 | 91.2        | 53.4 | 66.2      | 61.9 | 64.1    |
|       | UCB1-FLAD ( $R_{G/A}$ )  | 49.1    | 38.8    | 40.1    | 88.6 | 88.2 | 51.6      | 83.7 | 90.2        | 54.3 | 68.0      | 68.3 | 65.5    |
|       | EXP3-FLAD ( $R_{GMS}$ )  | 46.2    | 40.6    | 39.4    | 88.9 | 90.4 | 51.6      | 85.1 | 91.3        | 54.4 | 65.8      | 67.5 | 65.6    |
|       | UCB1-FLAD ( $R_{GMS}$ )  | 48.1    | 40.1    | 39.1    | 87.5 | 89.4 | 52.0      | 83.7 | 89.4        | 51.7 | 65.8      | 70.6 | 65.2    |
|       | EXP3-FLAD ( $R_{AGG}$ )  | 47.6    | 40.6    | 40.6    | 90.0 | 90.6 | 51.4      | 84.5 | 91.0        | 53.2 | 66.7      | 64.0 | 65.5    |
|       | UCB1-FLAD ( $R_{AGG}$ )  | 47.1    | 39.0    | 41.2    | 86.8 | 90.4 | 51.5      | 85.5 | 91.1        | 52.7 | 66.3      | 70.6 | 65.6    |
|       | Direct Fine-Tuning       | 40.9    | 39.1    | 37.1    | 79.6 | 66.4 | 43.5      | 67.1 | 83.2        | 52.5 | 54.6      | 56.7 | 56.4    |
|       | Loss-Scaling ( $G/A$ )   | 41.3    | 40.0    | 36.9    | 81.8 | 78.0 | 51.2      | 76.5 | 86.9        | 50.7 | 54.7      | 56.2 | 59.5    |
| TOMix | Loss-Scaling ( $G/M/S$ ) | 40.5    | 40.5    | 37.8    | 81.1 | 79.0 | 52.0      | 77.0 | 88.8        | 52.7 | 55.0      | 60.8 | 60.5    |
|       | Exploitation-Only        | 44.4    | 40.3    | 37.0    | 82.5 | 85.6 | 47.9      | 77.6 | 90.1        | 52.1 | 58.6      | 56.9 | 61.2    |
|       | Exploitation-Only        | 42.5    | 39.3    | 37.2    | 84.3 | 82.8 | 48.1      | 79.7 | 88.8        | 52.8 | 57.8      | 56.3 | 60.9    |
|       | EXP3-FLAD ( $R_{G/A}$ )  | 46.2    | 41.5    | 37.7    | 83.9 | 87.6 | 49.4      | 80.0 | 90.1        | 52.6 | 63.4      | 59.0 | 62.9    |
|       | UCB1-FLAD ( $R_{G/A}$ )  | 43.7    | 40.8    | 37.6    | 86.1 | 85.4 | 48.6      | 80.5 | 91.3        | 53.4 | 63.5      | 61.0 | 62.9    |
|       | EXP3-FLAD ( $R_{GMS}$ )  | 43.4    | 41.1    | 38.2    | 84.6 | 86.6 | 49.1      | 81.0 | 90.6        | 53.0 | 63.1      | 59.8 | 62.8    |
|       | UCB1-FLAD ( $R_{GMS}$ )  | 43.2    | 41.2    | 38.7    | 86.4 | 86.6 | 48.4      | 82.8 | 91.4        | 52.2 | 61.0      | 59.4 | 62.8    |
|       | EXP3-FLAD ( $R_{AGG}$ )  | 43.8    | 41.6    | 38.0    | 83.9 | 87.8 | 48.9      | 81.9 | 90.7        | 52.5 | 62.3      | 59.8 | 62.8    |
|       | UCB1-FLAD ( $R_{AGG}$ )  | 44.0    | 41.6    | 38.3    | 85.4 | 87.4 | 48.6      | 81.1 | 90.6        | 53.0 | 63.1      | 59.2 | 62.9    |
|       | Direct Fine-Tuning       | 44.0    | 40.4    | 38.9    | 86.4 | 77.6 | 51.0      | 75.1 | 86.8        | 51.7 | 55.6      | 59.8 | 60.7    |
|       | Loss-Scaling ( $G/M/S$ ) | 43.8    | 38.6    | 39.3    | 82.5 | 79.2 | 50.6      | 80.6 | 89.1        | 51.6 | 56.6      | 56.0 | 60.7    |
|       | Exploitation-Only        | 45.4    | 40.3    | 38.0    | 82.5 | 87.8 | 50.6      | 82.2 | 88.8        | 52.4 | 61.8      | 60.6 | 62.8    |
|       | Exploitation-Only        | 45.5    | 40.0    | 38.8    | 87.5 | 82.2 | 49.9      | 79.6 | 90.9        | 52.2 | 60.1      | 64.8 | 62.9    |
| P3    | EXP3-FLAD ( $R_{G/A}$ )  | 50.4    | 40.0    | 41.2    | 87.9 | 88.4 | 49.7      | 86.1 | 91.6        | 52.8 | 67.5      | 70.4 | 66.0    |
|       | UCB1-FLAD ( $R_{G/A}$ )  | 48.2    | 41.8    | 41.2    | 90.0 | 86.6 | 50.0      | 86.1 | 91.5        | 53.6 | 65.6      | 74.6 | 66.3    |
|       | EXP3-FLAD ( $R_{GMS}$ )  | 49.5    | 40.8    | 39.5    | 87.1 | 89.2 | 49.4      | 85.8 | 91.4        | 53.9 | 65.4      | 68.7 | 65.5    |
|       | UCB1-FLAD ( $R_{GMS}$ )  | 48.2    | 41.8    | 40.5    | 89.6 | 88.0 | 49.6      | 83.2 | 91.6        | 52.6 | 66.1      | 74.6 | 66.0    |
|       | EXP3-FLAD ( $R_{AGG}$ )  | 51.1    | 40.3    | 39.9    | 89.6 | 91.4 | 49.0      | 86.5 | 91.6        | 52.6 | 66.4      | 76.7 | 66.8    |
|       | UCB1-FLAD ( $R_{AGG}$ )  | 49.8    | 39.9    | 40.8    | 86.8 | 88.4 | 49.6      | 84.7 | 91.0        | 53.2 | 68.0      | 76.9 | 66.3    |

663 **E Probing the reward generating processes.**

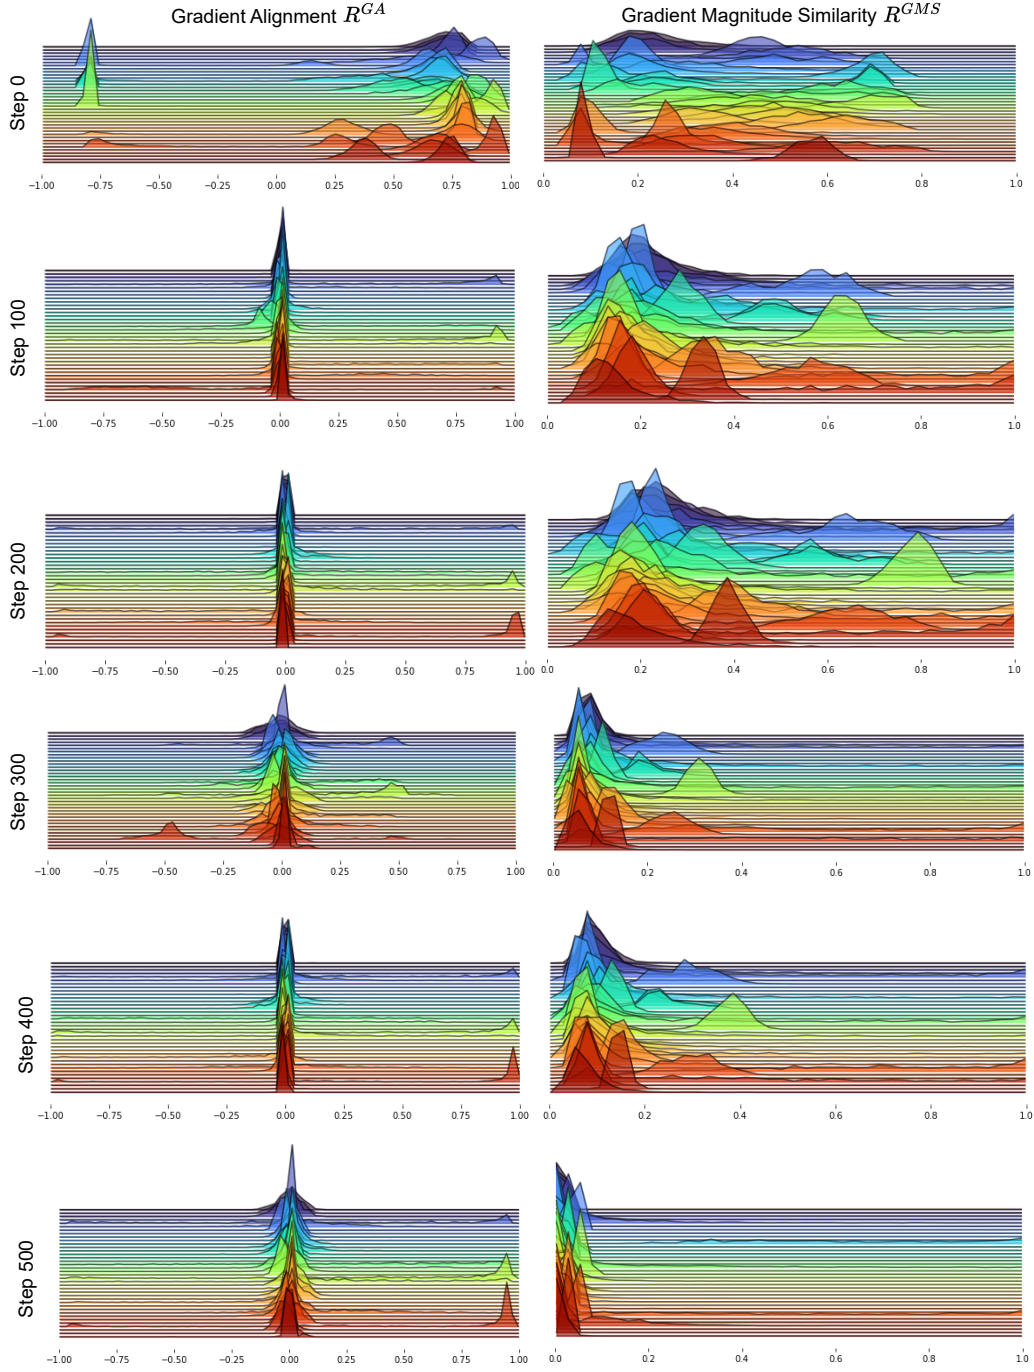

Figure 4: **Reward distributions** of  $\mathcal{R}^{GA}$  and  $\mathcal{R}^{GMS}$  prior to training and every 100 gradient updates thereafter. We probe the reward distributions using the T5-XL model with the T0Mix auxiliary dataset and WSC [52] as the target dataset.

## 664 **F EXP3-FLAD and UCB1-FLAD training dynamics**

665 The following 4 pages include a case study on the training dynamics of EXP3-FLAD and UCB1-  
666 FLAD when training T5-XL using T0Mix as the auxiliary data. First, we find datasets where  
667 EXP3-FLAD and UCB1-FLAD improve significantly over the baseline FLAD methods, but also  
668 where either EXP3-FLAD or UCB1-FLAD clearly outperforms the other. The two datasets that fulfill  
669 our interests are RTE and COPA.

670 We find that UCB1-FLAD outperforms EXP3-FLAD on RTE, and show their respective training  
671 dynamics in Figure 5 (UCB1) and Figure 6 (EXP3).

672 We find that EXP3-FLAD outperforms UCB1-FLAD on COPA, and show their respective training  
673 dynamics in Figure 7 (UCB1) and Figure 8 (EXP3).

674 We include details and takeaways in the caption for each figure. For EXP3-FLAD figures, we include  
675 charts of the cumulative estimated reward, empirical gradient alignment, instantaneous sampling  
676 distribution determined by the policy, and the empirical sampling distribution determined by the total  
677 number of samples seen per dataset as a fraction of the total samples seen. For UCB1-FLAD figures,  
678 we include charts of the upper confidence index, estimated gradient alignment, and the empirical  
679 sampling distribution.

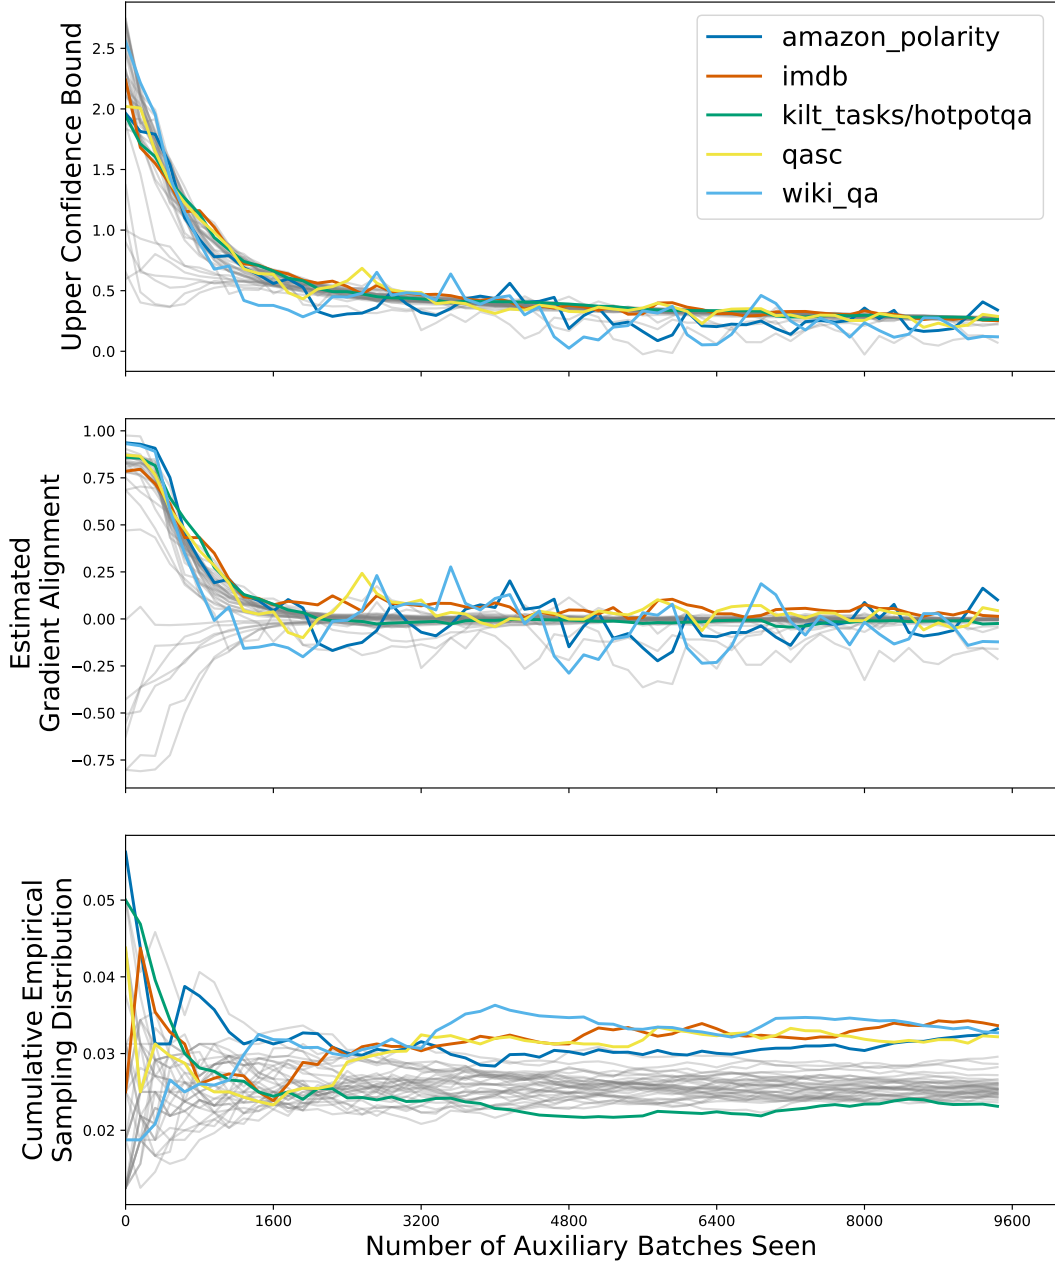

Figure 5: Training dynamics of UCB1-FLAD, a case study using RTE as target dataset and T0Mix as auxiliary data, where UCB1-FLAD outperforms EXP3-FLAD. Colored lines are a sample of auxiliary datasets with interesting properties, the remaining datasets are shown in grey. We find that even though wiki\_qa’s estimated gradient alignment falls to below 0 (middle), UCB1 does not abandon sampling from it in the future, finding that between 3200 and 4800 batches, it becomes the dataset with largest upper confidence bound (top). Similarly, we see that UCB1 alternates between wiki\_qa, amazon\_polarity, and qasc as the datasets with higher gradient alignment and upper confidence bounds. kilt\_tasks/hotpotqa has a very high gradient alignment prior to training, but UCB1 samples very infrequently from it, due to it’s lower upper confidence bound. This is a failure case for transfer learning-based methods. Interestingly, UCB1 never estimates imdb to have a negative gradient, and gradually samples from it more and more frequently over the course of training.

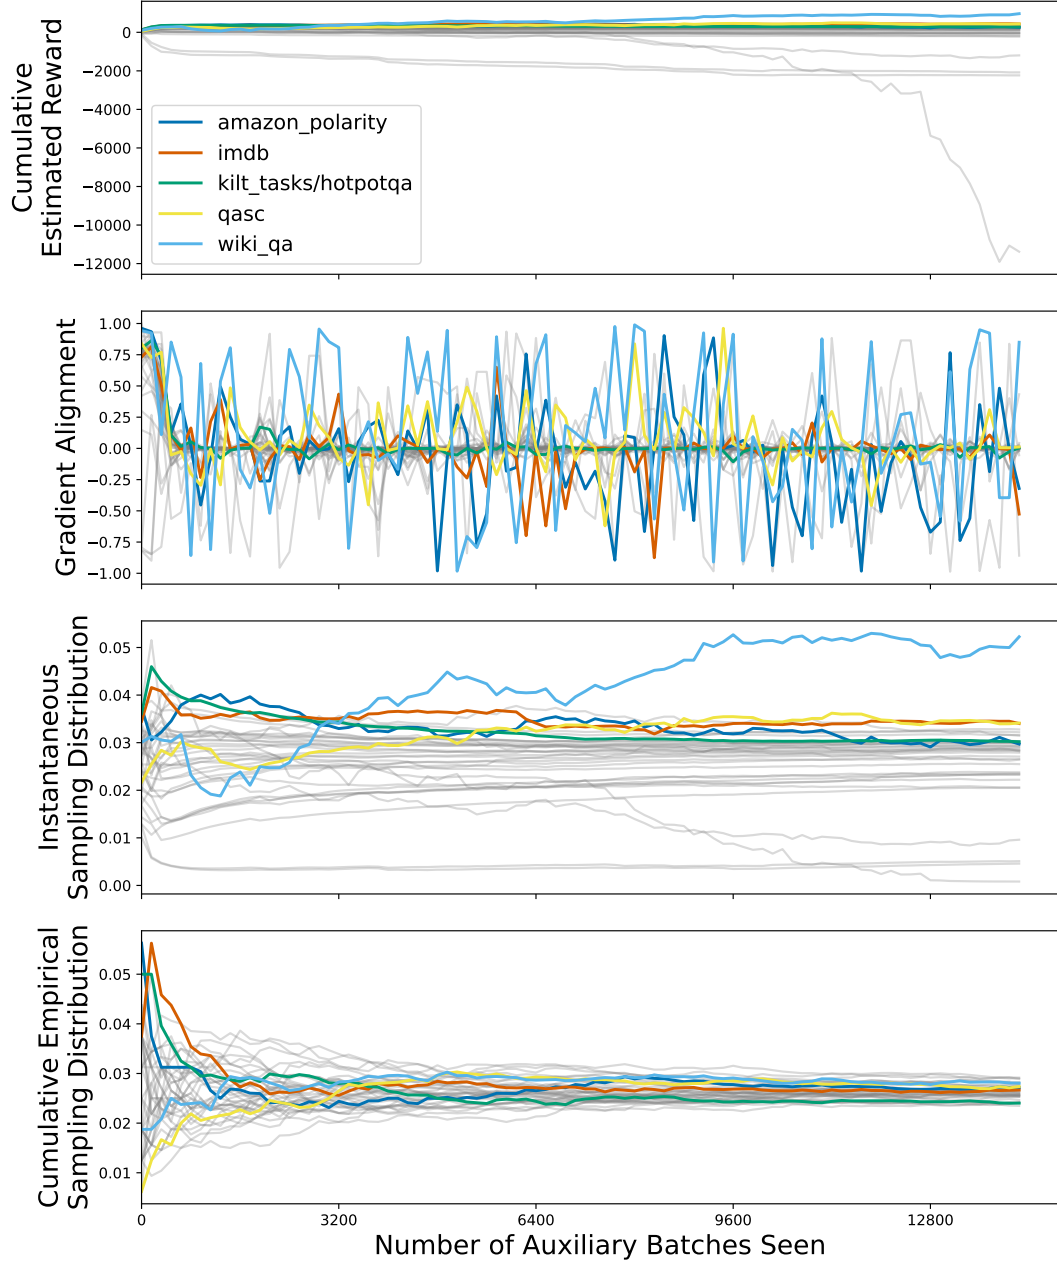

Figure 6: Training dynamics of EXP3-FLAD, a case study using RTE as target dataset and T0Mix as auxiliary data, where UCB1-FLAD outperforms EXP3-FLAD. Colored lines are a sample of auxiliary datasets with interesting properties, the remaining datasets are shown in grey. We find that the gradient alignment signal is particularly noisy for EXP3-FLAD, possibly leading to it’s slightly worse performance on RTE. All five highlighted auxiliary datasets have high instantaneous sampling probability, but over the course of training, the empirical sampling distribution is very condensed across the full set of auxiliary datasets, unlike UCB1 which is able to find better separation.

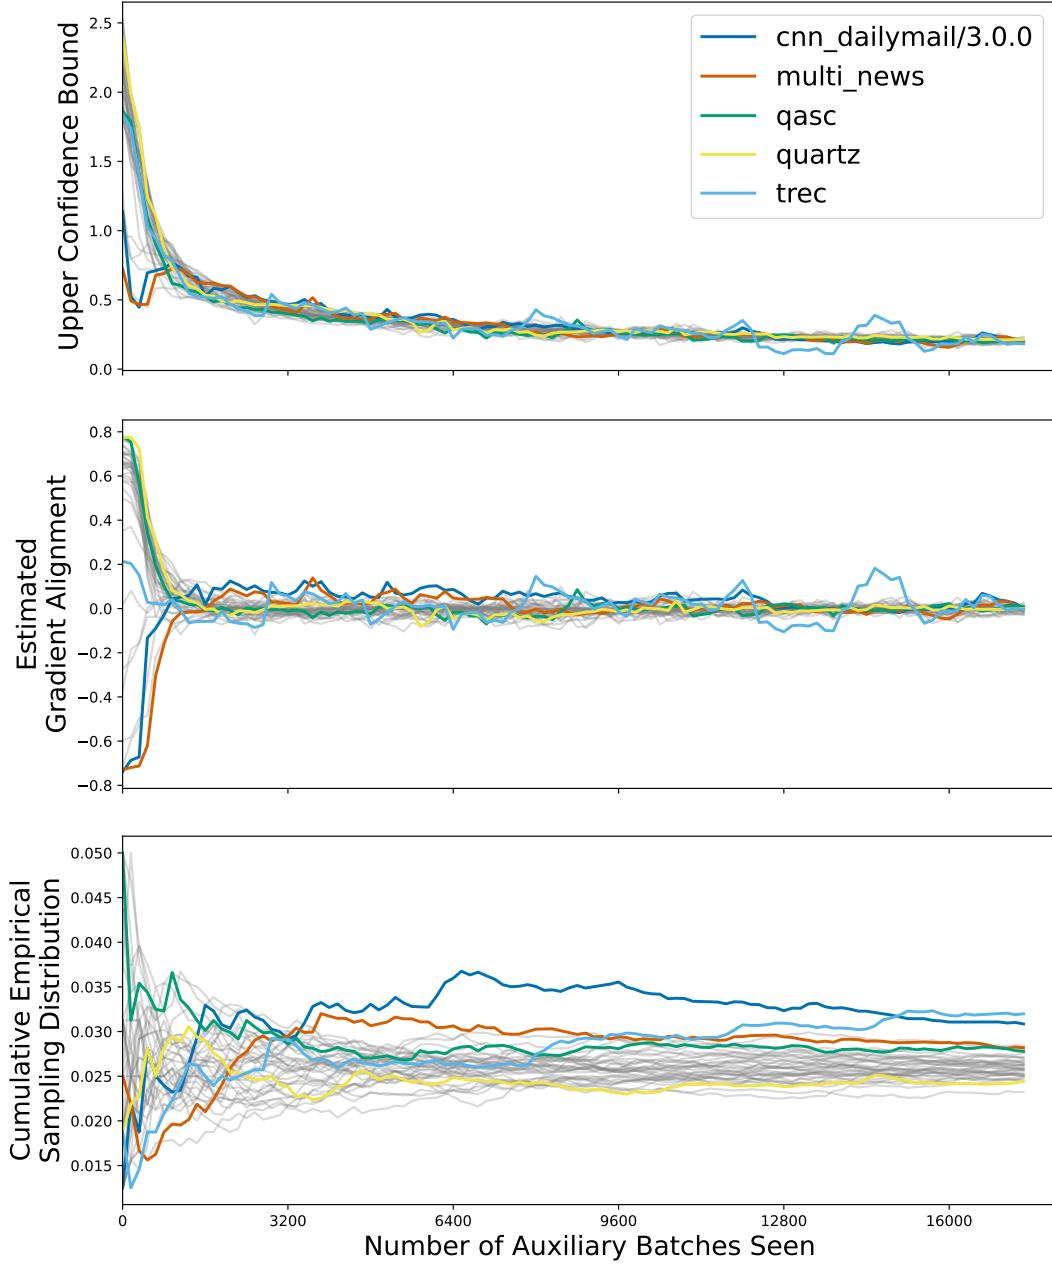

Figure 7: Training dynamics of UCB1-FLAD, a case study using COPA as target dataset and T0Mix as auxiliary data, where EXP3-FLAD outperforms UCB1-FLAD. Colored lines are a sample of auxiliary datasets with interesting properties, the remaining datasets are shown in grey. We find that although qasc and quartz start with very high gradient alignment, they very quickly fall to negative alignment (middle figure, green and yellow). In the end, we find that the algorithm samples much more from qasc than from quartz (bottom figure). Interestingly, we find that although both cnn\_dailymail and multi\_news start off with very negative gradient alignment, they quickly become the most aligned with the target task (middle figure, blue and red). We find that the three auxiliary datasets with highest upper confidence index (top figure) and largest sampling percent (bottom figure) are cnn\_dailymail, multi\_news, and trec even though these all considered dissimilar to the target prior to training.

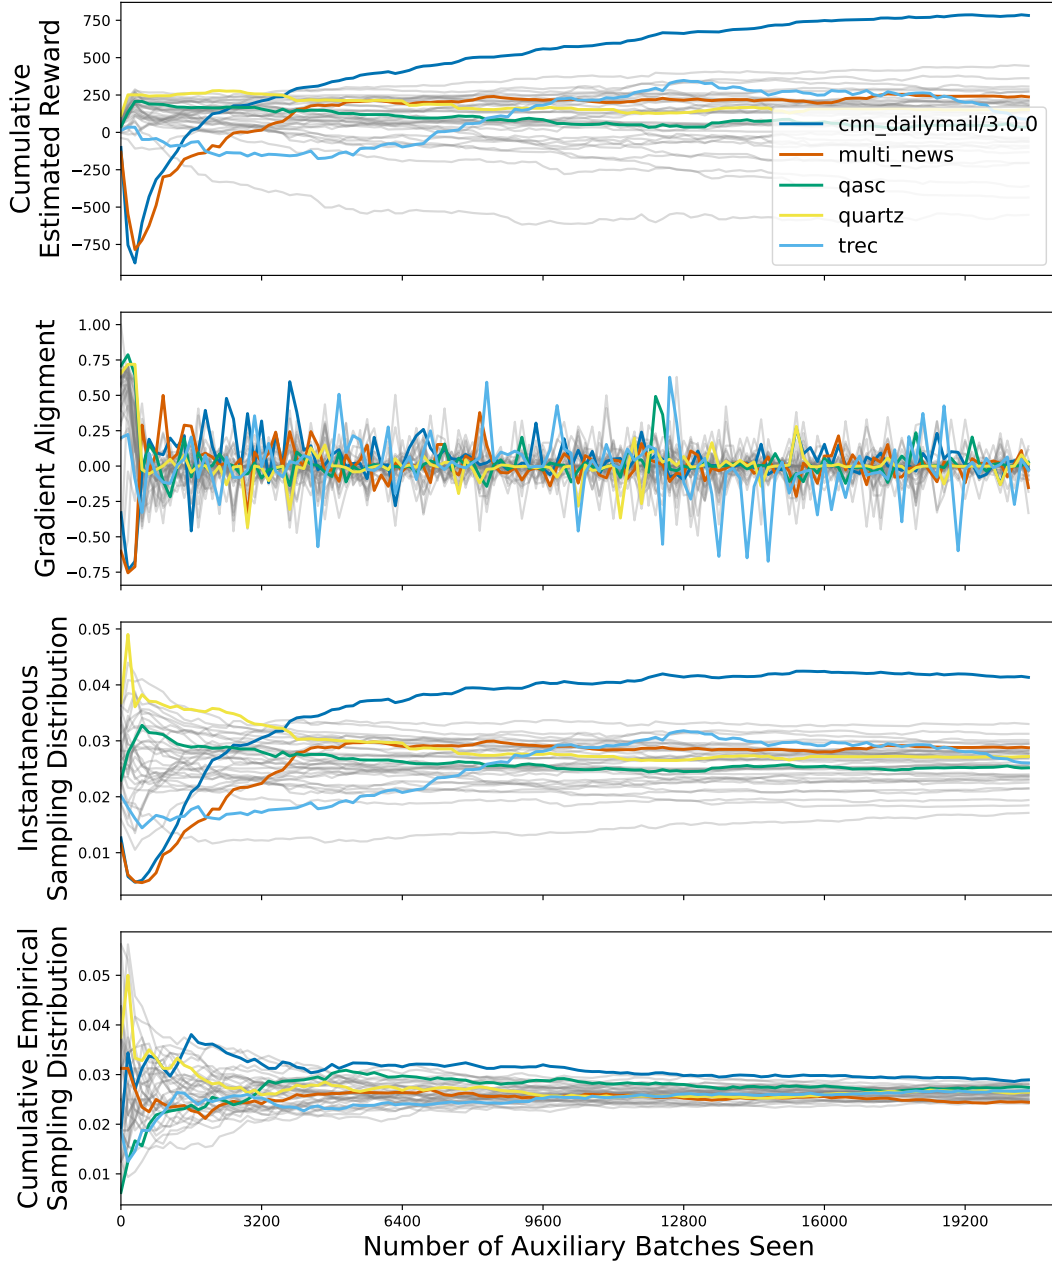

Figure 8: Training dynamics of EXP3-FLAD, a case study using COPA as target dataset and T0Mix as auxiliary data, where EXP3-FLAD outperforms UCB1-FLAD. Colored lines are a sample of auxiliary datasets with interesting properties, the remaining datasets are shown in grey. This is an impressive example of the importance-weighted estimated reward. We see that `cnn_dailymail` and `multi_news` both start with very negative alignment, but EXP3 quickly updates its estimated reward once their alignment becomes positive. Similar to RTE, we see that EXP3 never makes large separations in the empirical sampling distribution, possibly a reason why UCB1 outperforms EXP3 overall. Compared to RTE, we find that gradient alignments are much less variable, with a maximum alignment close to 0.5 and minimum alignment close to -0.5. Whereas in RTE, alignments regularly reach close to 1.0 and -1.0.

## G Auxiliary Datasets

Here we include the full list of auxiliary datasets from P3 [23] used to train models for the ANLI target task. Other target datasets have slightly different auxiliary datasets, but are generally the same. Datasets are listed by their name as found in HuggingFace Datasets<sup>2</sup>.

Zaid/quac\_expanded, acronym\_identification, ade\_corpus\_v2/Ade\_corpus\_v2\_classification, ade\_corpus\_v2/Ade\_corpus\_v2\_drug\_ade\_relation, ade\_corpus\_v2/Ade\_corpus\_v2\_drug\_dosage\_relation, adversarial\_qa/adversarialQA, adversarial\_qa/dbert, adversarial\_qa/dbidaf, adversarial\_qa/droberta, aesc, ag\_news, ai2\_arc/ARC-Challenge, ai2\_arc/ARC-Easy, amazon\_polarity, amazon\_reviews\_multi/en, amazon\_us\_reviews/Wireless\_v1\_00, ambig\_qa/light, app\_reviews, aqua\_rat/raw, art, asset/ratings, asset/simplification, banking77, billsum, bing\_coronavirus\_query\_set, biosses, blbooksgenre/title\_genre\_classification, blended\_skill\_talk, cbt/CN, cbt/NE, cbt/P, cbt/V, cbt/raw, cc\_news, circa, climate\_fever, cnn\_dailymail/3.0.0, codah/codah, codah/fold\_0, codah/fold\_1, codah/fold\_2, codah/fold\_3, codah/fold\_4, code\_x\_glue\_tc\_text\_to\_code, common\_gen, commonsense\_qa, conv\_ai, conv\_ai\_2, conv\_ai\_3, cord19/metadata, cos\_e/v1.0, cos\_e/v1.11, cosmos\_qa, covid\_qa-castorini, craffel/openai\_lambada, craigslist\_bargains, crows\_pairs, dbpedia\_14, disconfuse/disconfuse-sport, disconfuse/disconfuse-wikipedia, discovery/discovery, docred, dream, drop, duorc/ParaphraseRC, duorc/SelfRC, e2e\_nlg\_cleaned, ecthr\_cases/alleged-violation-prediction, emo, emotion, enriched\_web\_nlg/en, esnli, evidence\_infer\_treatment/1.1, evidence\_infer\_treatment/2.0, fever/v1.0, fever/v2.0, financial\_phrasebank/sentences\_allagree, freebase\_qa, generated\_reviews\_enth, gigaword, glue/ax, glue/cola, glue/mnli, glue/mnli\_matched, glue/mnli\_mismatched, glue/mrpc, glue/qnli, glue/qqp, glue/rte, glue/sst2, glue/stsb, glue/wnli, google\_wellformed\_query, great\_code, guardian\_authorship/cross\_genre\_1, guardian\_authorship/cross\_topic\_1, guardian\_authorship/cross\_topic\_4, guardian\_authorship/cross\_topic\_7, gutenberg\_time, hans, hate\_speech18, head\_qa/en, health\_fact, hlgd, hotpot\_qa/distractor, hotpot\_qa/fullwiki, humicroedit/subtask-1, humicroedit/subtask-2, hyperpartisan\_news\_detection/byarticle, hyperpartisan\_news\_detection/bypublisher, imdb, jfleg, kelm, kilt\_tasks/hotpotqa, kilt\_tasks/nq, lama/trex, lambada, liar, limit, math\_dataset/algebra\_linear\_1d, math\_dataset/algebra\_linear\_1d\_composed, math\_dataset/algebra\_linear\_2d, math\_dataset/algebra\_linear\_2d\_composed, math\_qa, mc\_taco, mdd/task1\_qa, mdd/task2\_recs, mdd/task3\_qarecs, medal, medical\_questions\_pairs, meta\_woz/dialogues, mocha, movie\_rationales, multi\_news, multi\_nli, multi\_x\_science\_sum, mwsc, narrativeqa, ncbi\_disease, neural\_code\_search/evaluation\_dataset, newspaper, nlu\_evaluation\_data, nq\_open, numer\_sense, onestop\_english, openai\_humaneval, openbookqa/additional, openbookqa/main, paws-x/en, paws/labeled\_final, paws/labeled\_swap, paws/unlabeled\_final, piqa, poem\_sentiment, pubmed\_qa/pqa\_labeled, qa\_srl, qa\_zre, qasc, qed, quac, quail, quarel, quartz, quora, quoref, race/all, race/high, race/middle, riddle\_sense, ropes, rotten\_tomatoes, samsum, scan/addprim\_jump, scan/addprim\_turn\_left, scan/filler\_num0, scan/filler\_num1, scan/filler\_num2, scan/filler\_num3, scan/length, scan/simple, scan/template\_around\_right, scan/template\_jump\_around\_right, scan/template\_opposite\_right, scan/template\_right, scicite, scientific\_papers/arxiv, scientific\_papers/pubmed, sciq, scitail/snli\_format, scitail/tsv\_format, scitldr/Abstract, selqa/answer\_selection\_analysis, sem\_eval\_2010\_task\_8, sem\_eval\_2014\_task\_1, sent\_comp, sick, sms\_spam, snips\_built\_in\_intents, snli, social\_i\_qa, species\_800, squad, squad\_adversarial/AddSent, squad\_v2, squadshifts/amazon, squadshifts/new\_wiki, squadshifts/nyt, sst/default, stsb\_multi\_mt/en, subjqa/books, subjqa/electronics, subjqa/grocery, subjqa/movies, subjqa/restaurants, subjqa/tripadvisor, super\_glue/axb, super\_glue/axg, super\_glue/boolq, super\_glue/multirc, super\_glue/record, swag/regular, tab\_fact/tab\_fact, tmu\_gfm\_dataset, trec, trivia\_qa/unfiltered, turk, tweet\_eval/emoji, tweet\_eval/emotion, tweet\_eval/hate, tweet\_eval/irony, tweet\_eval/offensive, tweet\_eval/sentiment, tweet\_eval/stance\_abortion, tweet\_eval/stance\_atheism, tweet\_eval/stance\_climate, tweet\_eval/stance\_feminist, tweet\_eval/stance\_hillary, tydiqa/primary\_task, tydiqa/secondary\_task, web\_questions, wiki\_bio, wiki\_hop/masked, wiki\_hop/original, wiki\_qa, wiki\_split, wino\_bias/type1\_anti, wino\_bias/type1\_pro, wino\_bias/type2\_anti, wino\_bias/type2\_pro, winograd\_wsc/wsc273, winograd\_wsc/wsc285, wiqa, xnli/en, xquad/xquad.en, xquad\_r/en, xsum, yahoo\_answers\_qa, yahoo\_answers\_topics, yelp\_polarity, yelp\_review\_full, zest

<sup>2</sup><https://huggingface.co/datasets>
